# Supplementary material for: Proteotoxicity in cardiac amyloidosis: amyloidogenic light chains affect the levels of intracellular proteins in human heart cells
Source: PubMed Central journal article supplement (PMC5688098; doi:10.1038/s41598-017-15424-3), 2017-11-15
Supplement: 41598_2017_15424_MOESM1_ESM.pdf [file 41598_2017_15424_MOESM1_ESM.pdf]

## **Proteotoxicity in cardiac amyloidosis: amyloidogenic light chains affect the levels of intracellular proteins in human heart cells**

Esther Imperlini<sup>1,2</sup>, Massimiliano Gnechi<sup>3,4,5</sup>, Paola Rognoni<sup>6</sup>, Eduard Sabidò<sup>7,8</sup>, Maria Chiara Ciuffreda<sup>3</sup>, Giovanni Palladini<sup>6</sup>, Guadalupe Espadas<sup>7,8</sup>, Francesco Mattia Mancuso<sup>7,8</sup>, Margherita Bozzola<sup>6</sup>, Giuseppe Malpasso<sup>3</sup>, Veronica Valentini<sup>6</sup>, Giuseppina Palladini<sup>9</sup>, Stefania Orrù<sup>1,2,10</sup>, Giovanni Ferraro<sup>6</sup>, Paolo Milani<sup>6</sup>, Stefano Perlini<sup>9</sup>, Francesco Salvatore<sup>2,11,\*</sup>, Giampaolo Merlini<sup>6,\*</sup>, Francesca Lavatelli<sup>6</sup>

<sup>1</sup>IRCCS SDN, Naples, Italy

<sup>2</sup>CEINGE–Biotecnologie Avanzate, Naples, Italy

<sup>3</sup> Coronary Care Unit and Laboratory of Experimental Cardiology for Cell and Molecular Therapy, Fondazione IRCCS Policlinico San Matteo, Pavia, Italy.

<sup>4</sup> Department of Molecular Medicine, Unit of Cardiology, University of Pavia, Pavia, Italy.

<sup>5</sup> Department of Medicine, University of Cape Town, Cape Town, South Africa

<sup>6</sup> Amyloidosis Research and Treatment Center, Department of Molecular Medicine, Fondazione IRCCS Policlinico San Matteo and University of Pavia, Italy

<sup>7</sup> Centre for Genomic Regulation (CRG), The Barcelona Institute for Science and Technology, Barcelona, Spain

<sup>8</sup> Universitat Pompeu Fabra (UPF), Barcelona, Spain

<sup>9</sup> Department of Internal Medicine, Fondazione IRCCS Policlinico San Matteo and University of Pavia, Italy

<sup>10</sup> Department of Movement Sciences, “Parthenope” University, Naples, Italy

<sup>11</sup> Department of Molecular Medicine and Medical Biotechnologies, University of Naples “Federico II”, Italy

\*Correspondence and requests for materials should be addressed to F.S. (e-mail: salvator@unina.it) and G.M. (e-mail: [gmerlini@unipv.it](mailto:gmerlini@unipv.it))

## Supplementary Tables

**Table S1.** Proteins identified as specific component of the proteome of CardioLC-treated cells by shotgun analysis, in comparison with control cells.

| <b>CardioLC versus control cells</b> |                                                              |                |                    |                 |
|--------------------------------------|--------------------------------------------------------------|----------------|--------------------|-----------------|
| <b>Gene name</b>                     | <b>Protein name</b>                                          | <b>UniProt</b> | <b>Control hCF</b> | <b>CardioLC</b> |
| IGLL5                                | Immunoglobulin lambda-like polypeptide 5                     | B9A064         | absent             | <b>present</b>  |
| ICAM1                                | Intercellular adhesion molecule 1                            | P05362         | absent             | <b>present</b>  |
| BPGM                                 | Bisphosphoglycerate mutase                                   | P07738         | absent             | <b>present</b>  |
| IGLC2                                | Ig lambda-2 chain C regions                                  | P0CG05         | absent             | <b>present</b>  |
| VCAN                                 | Versican core protein                                        | P13611         | absent             | <b>present</b>  |
| SNRNPB                               | Small nuclear ribonucleoprotein-associated proteins B and B' | P14678         | absent             | <b>present</b>  |
| M6PR                                 | Cation-dependent mannose-6-phosphate receptor                | P20645         | <b>present</b>     | absent          |

**Table S2.** 2D DIGE Experimental Design.

| <b>Gel</b> | <b>Cy3<br/>(50 µg of protein lysate)</b> | <b>Cy5<br/>(50 µg of protein lysate)</b> | <b>Cy2<br/>(50 µg of protein lysate)</b> |
|------------|------------------------------------------|------------------------------------------|------------------------------------------|
| 1          | Control<br>replicate 1                   | CardioLC<br>replicate 3                  | Pooled standard                          |
| 2          | Control<br>replicate 2                   | CardioLC<br>replicate 4                  | Pooled standard                          |
| 3          | CardioLC<br>replicate 1                  | MMLC<br>replicate 3                      | Pooled standard                          |
| 4          | CardioLC<br>replicate 2                  | MMLC<br>replicate 4                      | Pooled standard                          |
| 5          | MMLC<br>replicate 1                      | Control<br>replicate 3                   | Pooled standard                          |
| 6          | MMLC<br>replicate 2                      | Control<br>replicate 4                   | Pooled standard                          |

**Table S3.** Proteins differentially represented both in hCF treated with CardioLC and in adipose tissue of patients affected by AL amyloidosis.

| Gene     | Protein                                          | Localization | Direction                    | Comparison* |
|----------|--------------------------------------------------|--------------|------------------------------|-------------|
| TLN1     | Talin-1                                          | CT           | ↓                            | 1           |
| FLNA     | Filamin-A                                        | CT           | ↓                            | 1           |
| ANXA5    | Annexin A5                                       | CY           | ↓                            | 1           |
| SERPINH1 | Serpin H1                                        | ER           | ↓                            | 2           |
| AHNAK    | AHNAK protein                                    | N            | ↓                            | 1           |
| ATP5A1   | ATP synthase subunit alpha                       | M            | ↓                            | 2           |
| EHD2     | EH domain-containing protein 2                   | CM           | ↓                            | 2           |
| CLTC     | Clathrin heavy chain 1                           | CM           | ↓                            | 1           |
| MYH9     | Myosin-9                                         | CT           | ↑                            | 2           |
| LMNA     | Prelamin-A/C                                     | N            | ↓                            | 3           |
| FN1      | Fibronectin                                      | ECM          | ≠ (↑ in tissue; ↓ in hCF)    | 1           |
| VCL      | Vinculin                                         | CT           | ≠ (↑ in tissue; ↓ in hCF)    | 2           |
| VIM      | Vimentin                                         | CT           | ≠ (↑ in hCF; ↓ in tissue)    | 1           |
| HADHB    | Trifunctional enzyme subunit beta, mitochondrial | M            | ≠ (↑ in tissue; ↓ in hCF) ** | 2           |
| COL1A2   | Collagen alpha-2(I) chain                        | ECM          | ≠ (↑ in tissue; ↓ in hCF)    | 1           |

\* Comparison 1: CardioLC vs Control and vs MMLC; Comparison 2: CardioLC vs Control only; Comparison 3: CardioLC versus MMLC only

\*\* HADHA subunit in fat tissue

CY: cytoplasm; ER: endoplasmic reticulum; N: nucleus; M: mitochondrion; CM: cell membrane; ECM: extracellular matrix; CT: cytoskeleton.



c

CardioLC-treated cells *versus* MMLC-treated cells  
Developmental Disorder, Hereditary Disorder, Organismal Injury and Abnormalities

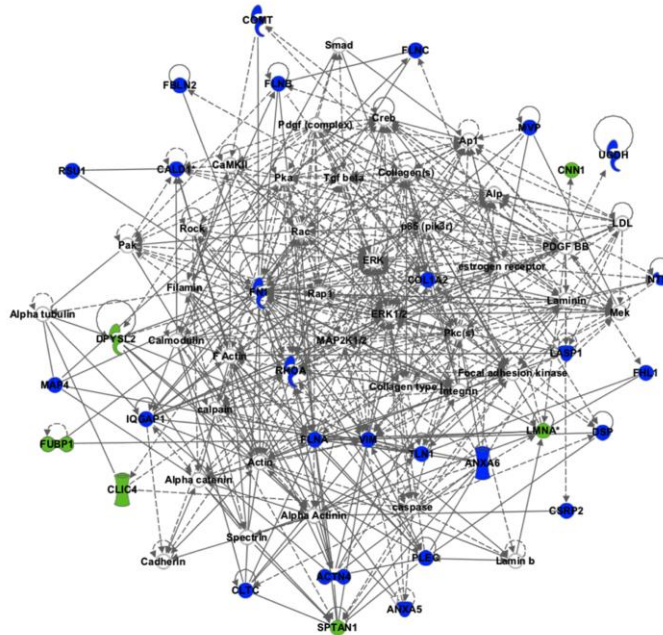

**Figure S1. Multidirectional interaction networks according to IPA software.** (a) and (b) Proteins identified as differentially represented in the CardioLC *vs* control comparison, by taking into account the results of both the shotgun and the 2D DIGE analysis. Red: proteins identified as differential only in the CardioLC *vs* control comparison; blue: proteins identified as differential both in the CardioLC *vs* control and in the CardioLC *vs* MMLC comparison. The differential proteins belong to two high-score biological networks, associated to (a) “Cancer, Cell Death and Survival, Organismal Injury and Abnormalities” (score=78) and (b) “Cell Morphology, Cellular Assembly and Organization, Cellular Function and Maintenance” (score=67). (c) Proteins identified as differential in the CardioLC *vs* MMLC comparison. The differential proteins belong to one high-score biological network associated to (c) “Developmental Disorder, Hereditary Disorder, Organismal Injury and Abnormalities. Green: proteins identified as differential only in the CardioLC *vs* MMLC comparison; blue: proteins identified as differential both in the CardioLC *vs* control and in the CardioLC *vs* MMLC comparison.

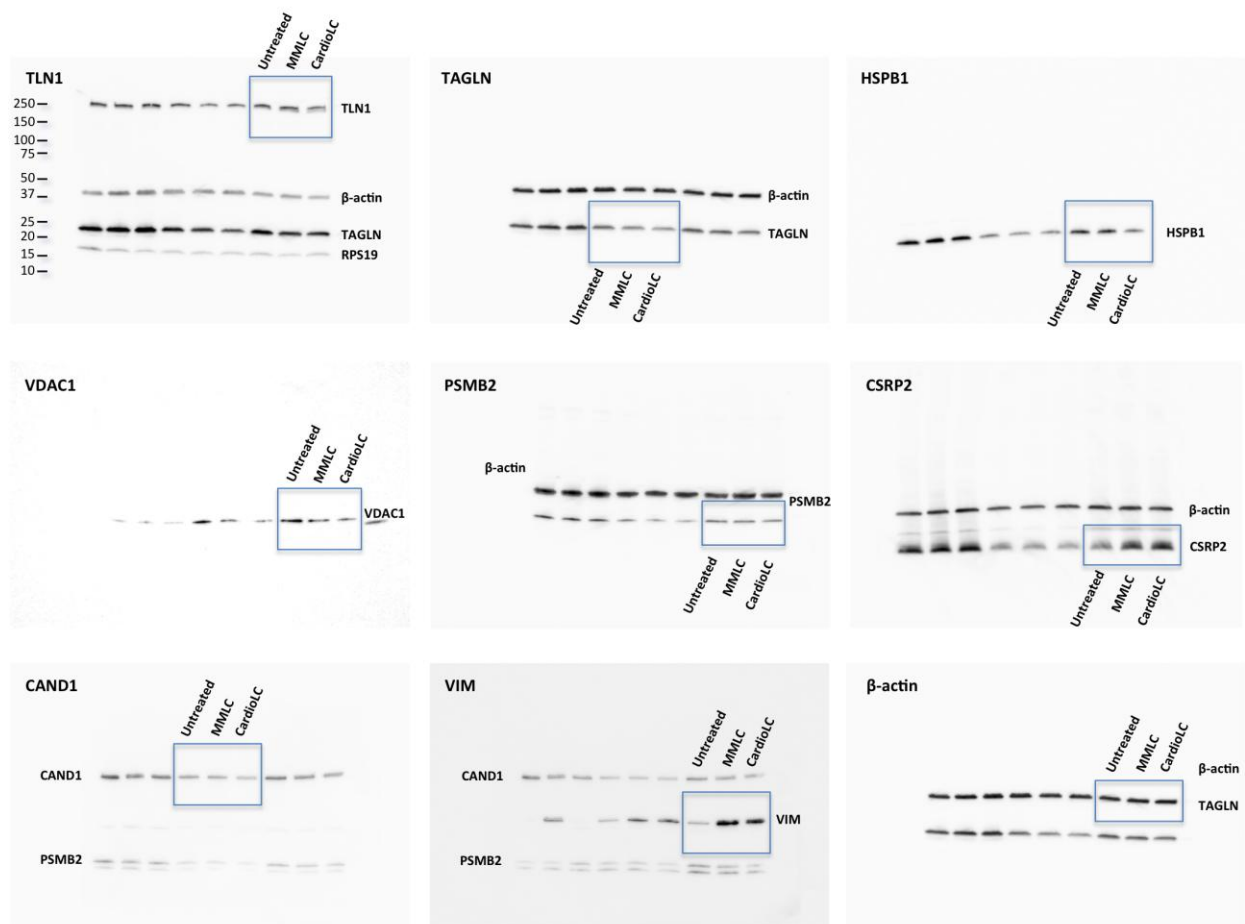

**Figure S2. Full length digital images of the western blots displayed in Fig 4.** Each image refers to the replicate displayed in the text (boxed) for each indicated protein. The appearance of multiple bands in some images is due to the sequential evaluation of multiple proteins on the same membrane.

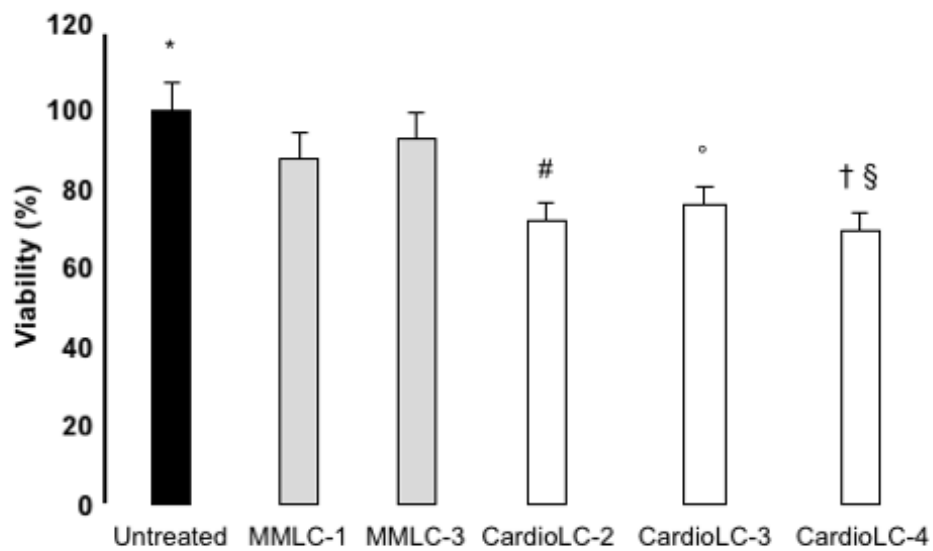

**Figure S3. Evaluation of effects on cell viability by different LCs.** Cell viability was significantly reduced in hCFs exposed for 24 h to 3 different CardioLCs, compared to hCFs exposed to 2 different MMLC and to untreated ones. \**p* value <0.001 versus CardioLC-2, CardioLC-3, CardioLC-4; #*p* value <0.01 versus MMLC-3; °*p* value <0.05 versus MMLC-3; †*p* value <0.01 versus MMLC-1; §*p* value <0.001 versus MMLC-3.



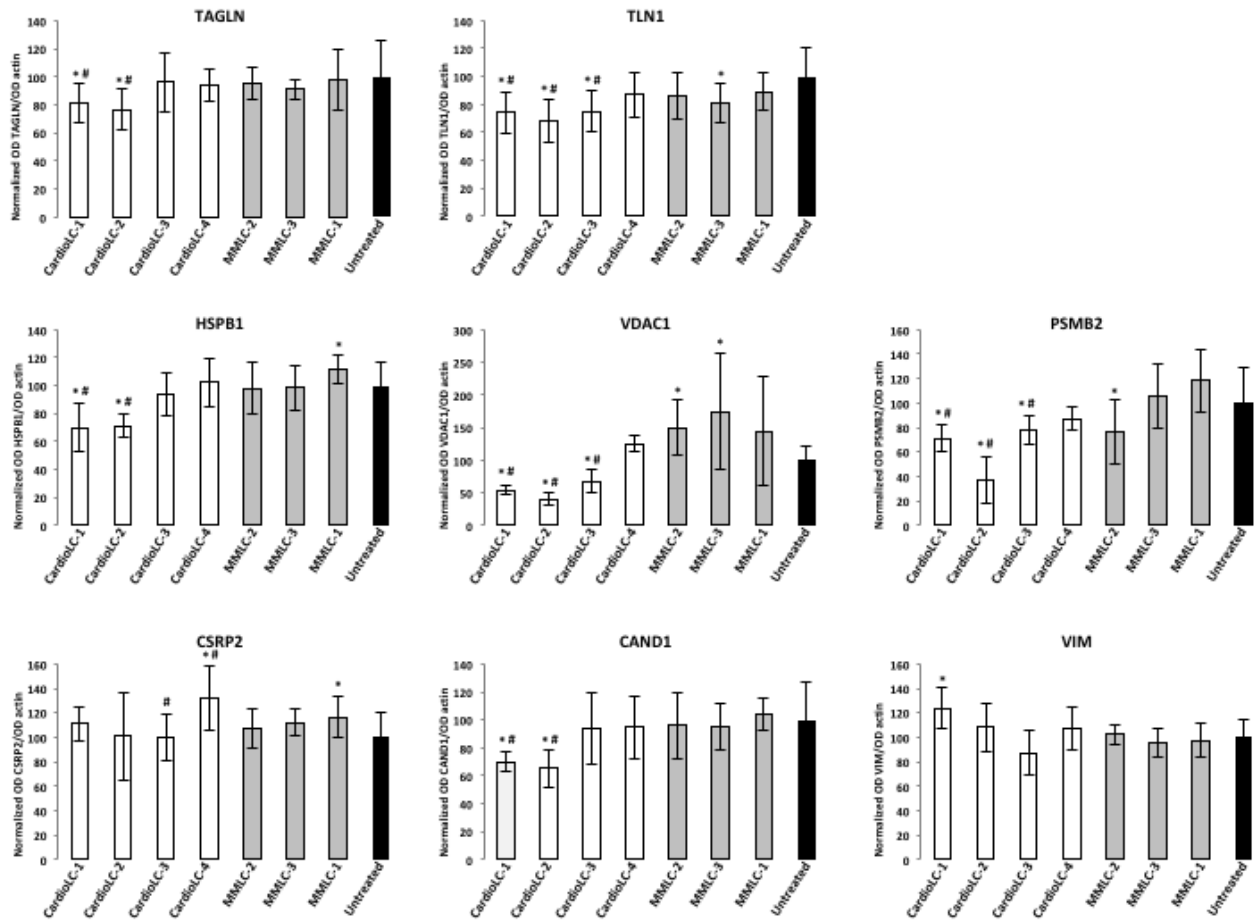

**Figure S4. Verification of differentially represented proteins in hCFs incubated with other LCs using western blot.** Data referred to each LC are individually presented. The graphs display the ratio (average values; bars represent standard deviations) between the signal of each protein and the corresponding  $\beta$ -actin, normalized against the average of the corresponding control cells. Results were statistically evaluated by 2-tailed unpaired Student's t-test. \* $p$  value < 0.05 versus Untreated; # $p$  value < 0.05 versus MMLC.
